# Supplementary material
Source: MDPI journal article supplement (https://www.mdpi.com/2227-9717/9/2/366)
Supplement: s1 [file s1]

## Supplementary Materials

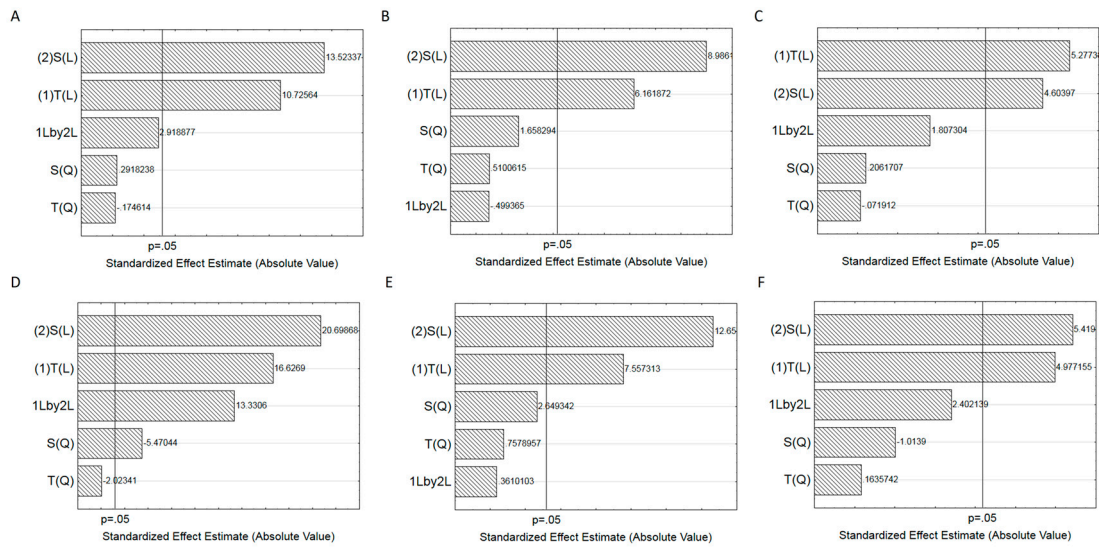

Figure S1: Pareto charts of the total xylose yield (A), total arabinose yield (B), total glucose yield (C), monomer xylose yield (D), monomer arabinose yield (E) and monomer glucose yield (F),

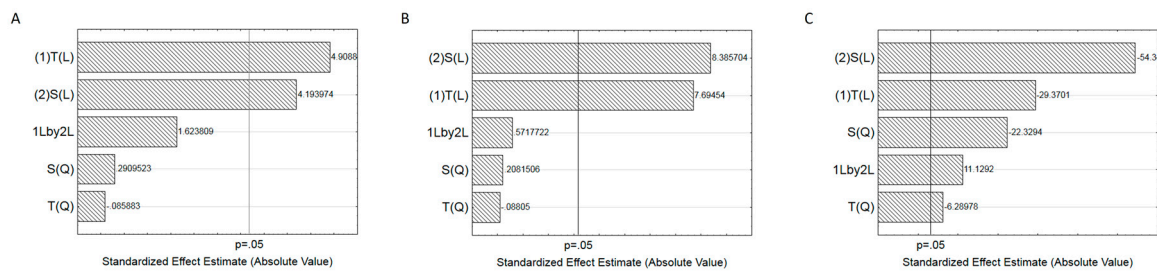

Figure S2: Pareto charts of the GOS yield (A), AXOS yield (B) and the A/X ratio in AXOS (C)

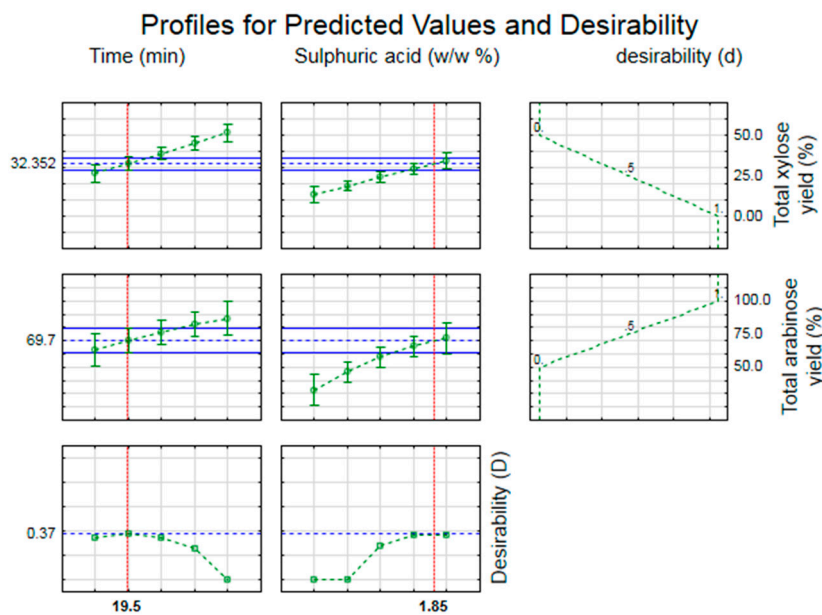

Figure S3: The optimised conditions of the first acidic hydrolysis obtained by D-function approach

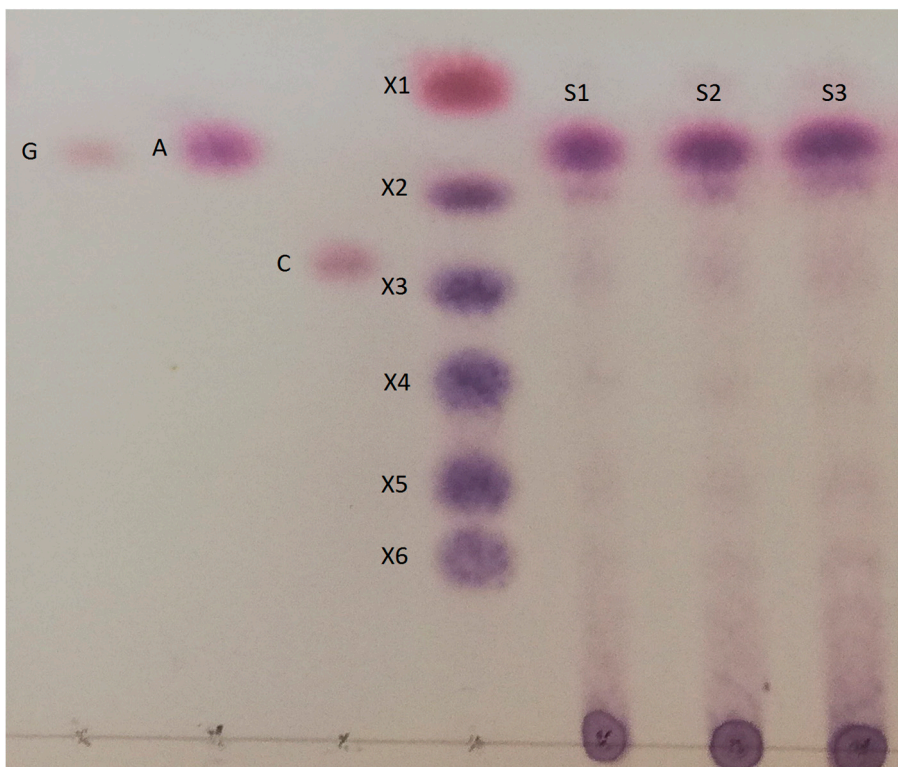

Figure S4: TLC analysis of the optimized first acidic hydrolysate. G: glucose, A: arabinose, C: cellobiose, X1: xylose, X2: xylobiose, X3: xylotriose, X4: xylotetraose, X5: xylopentaose, X6: xylohexaose S1–S3: hydrolysates obtained under optimized conditions of the first acidic hydrolysis step

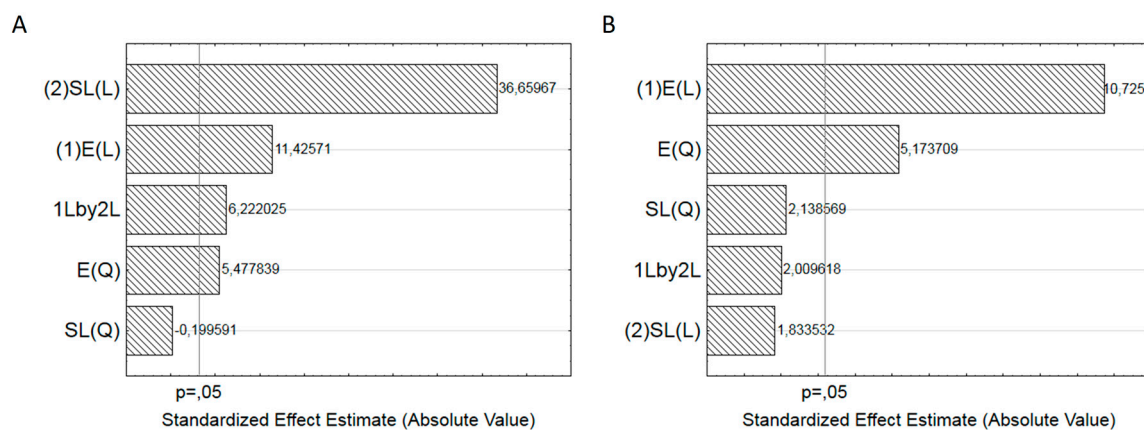

Figure S5: Pareto charts of glucose concentration (A) and glucose yield (B) obtained in designed experiments of the enzymatic hydrolysis process step.
